# Supplementary material for: Gut Antibody Deficiency in a Mouse Model of CVID Results in Spontaneous Development of a Gluten-Sensitive Enteropathy
Source: PubMed Central journal article supplement (PMC6820504; doi:10.3389/fimmu.2019.02484), 2019-10-23
Supplement: Data_Sheet_1.pdf [file Data_Sheet_1.pdf]

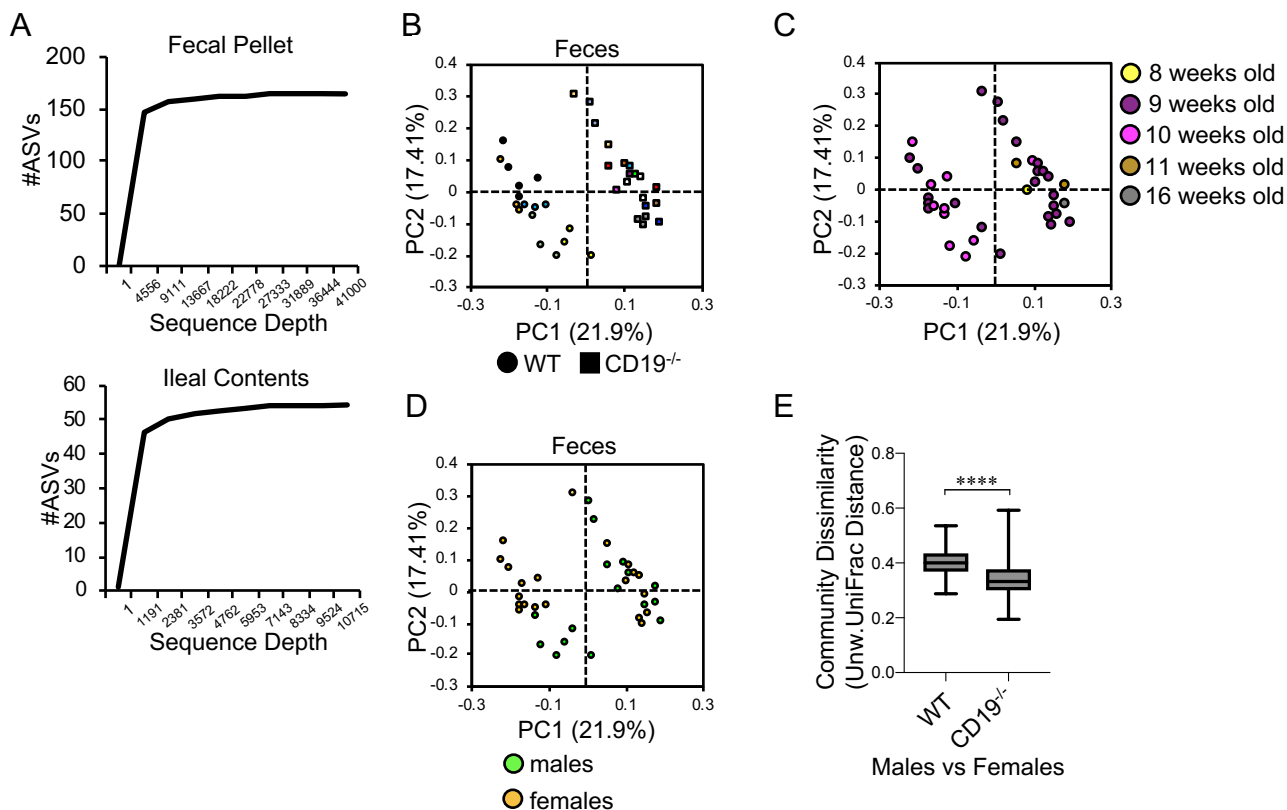

**Supplementary Figure S1. Sampling for 16S microbiota profiling experiment and the effect of cage, age, and gender on microbiota composition.** (A) Rarefaction plot of observed ASVs by sequence depth. (upper plot) Fecal samples were rarified to a depth of 41235 high-quality sequences per sample prior to analysis. (lower plot) Ileal samples were rarified to a depth of 10715 high-quality sequences per sample prior to analysis. (B) PcoA plot based on unweighted UniFrac analysis of  $\beta$ -diversity with samples colored by the cage animals were sampled from. Cage is not a significant driver of community divergence among individuals. (C) PcoA plot based on unweighted UniFrac analysis of  $\beta$ -diversity with samples colored by the age of animals used in analysis. (D) PcoA plot based on unweighted UniFrac analysis of  $\beta$ -diversity with samples colored by the gender of animals used in analysis. (E) Pair-wise comparison of community dissimilarity among male and female animals of each genotype. Student's t-test; \*\*\*\*= $p < 0.0001$ . Gender has a significant effect on community divergence in WT but not CD19<sup>-/-</sup> mice.

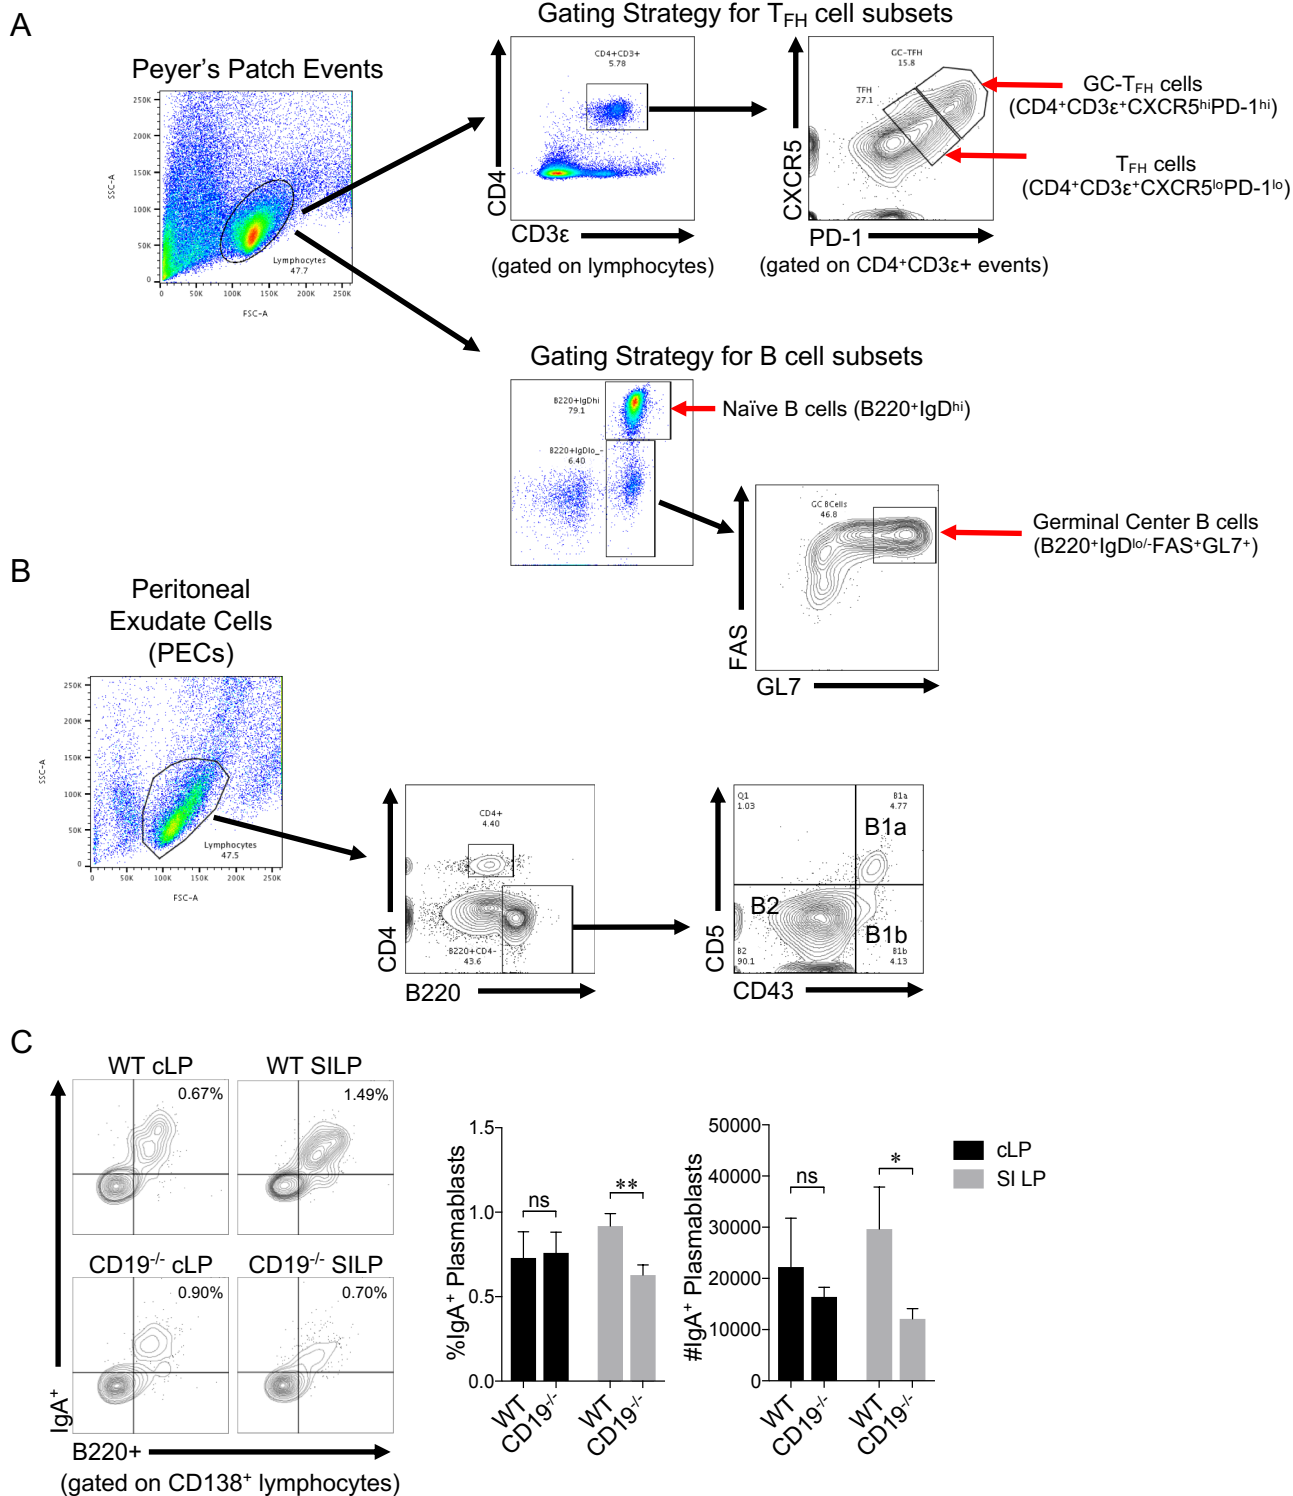

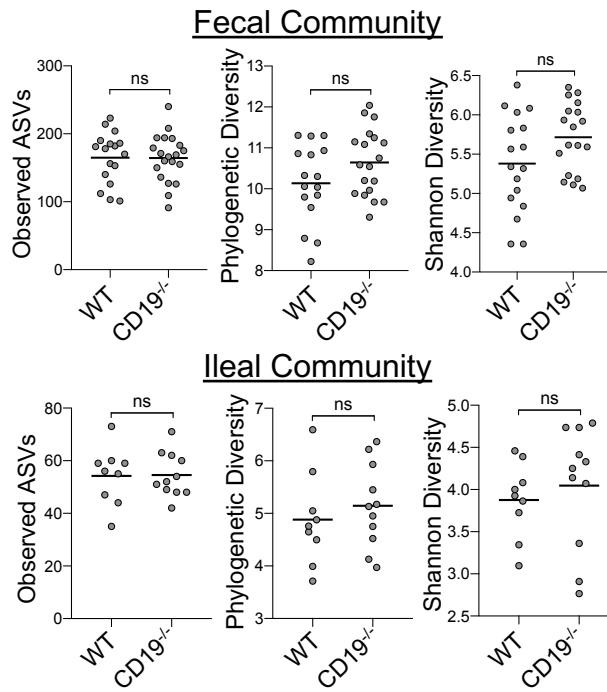

**Supplementary Figure S3. Comparison of  $\alpha$ -diversity between WT and CD19<sup>-/-</sup> microbiota communities.** Pairwise comparison of  $\alpha$ -diversity estimates (Observed ASVs, Faith's Phylogenetic Diversity, and Shannon Diversity) between genotypes are shown. Student's t-test; ns=not significant).

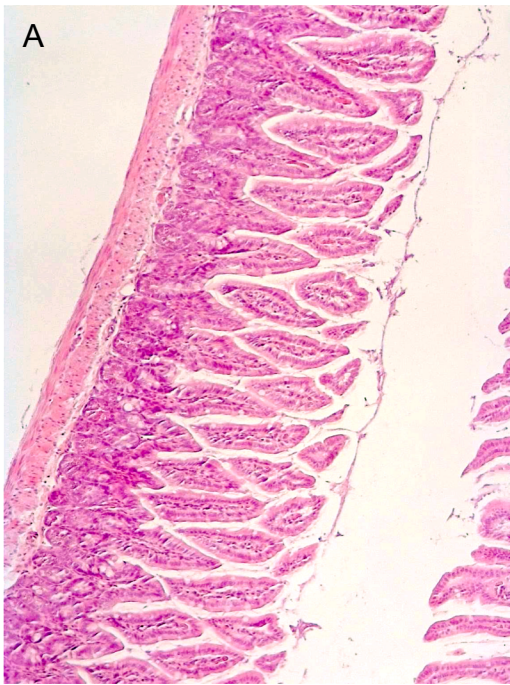

WT mouse ileum  
(10X magnification)

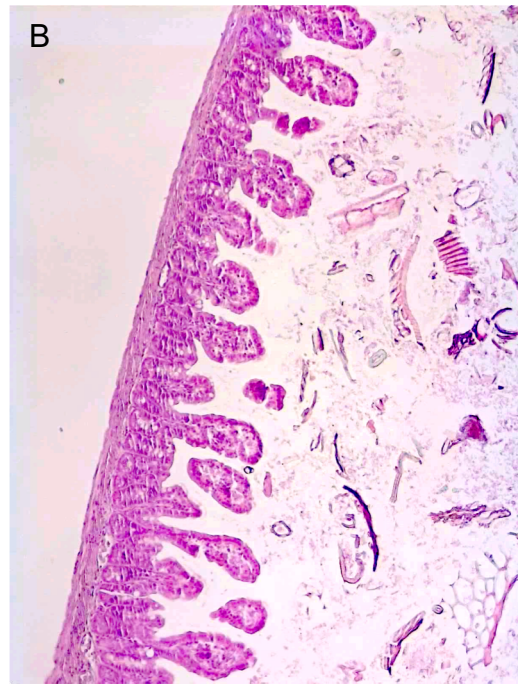

CD19<sup>-/-</sup> mouse ileum  
(10X magnification)

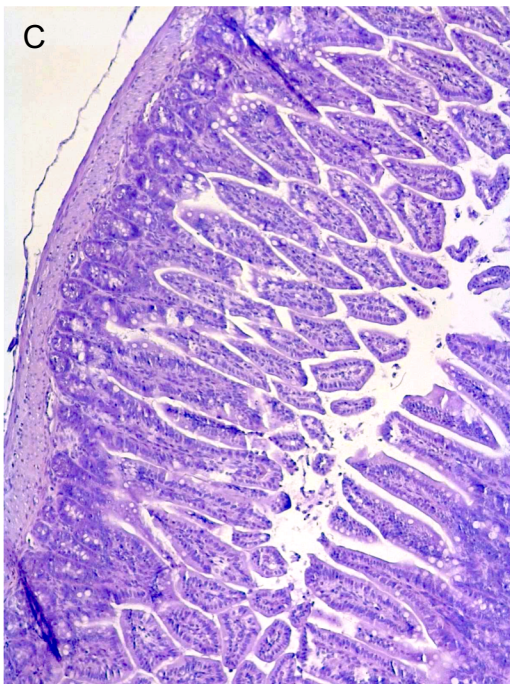

CD19<sup>-/-</sup> mouse ileum  
(10X magnification)  
(Metronidazole treated)

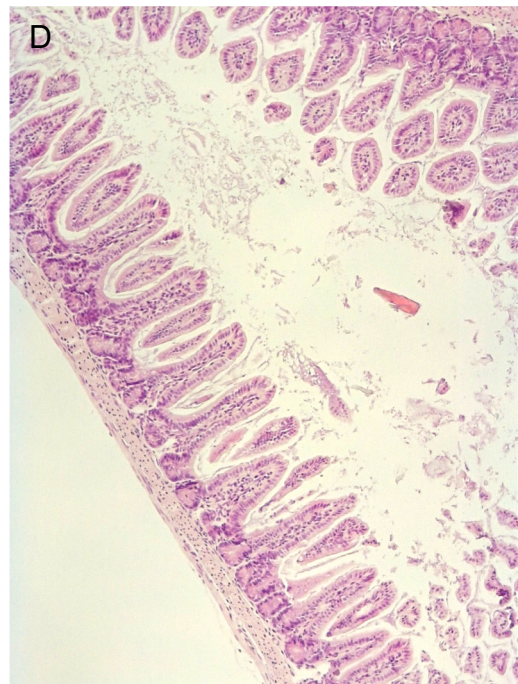

CD19<sup>-/-</sup> mouse ileum  
(10X magnification)  
(GFD treated)

**Supplementary Figure S4. Representative histology sections of animal cohorts.** High resolution images of H&E-stained ileal sections from (A) a WT mouse, (B) a CD19<sup>-/-</sup> mouse, (C) a CD19<sup>-/-</sup> mouse treated with metronidazole, and (D) a CD19<sup>-/-</sup> mouse treated with GFD.

**A****Scoring Rubric****Score=0:** no inflammation observed**Score=1:** low-grade inflammation, scattered mononuclear cell infiltration**Score=2:** moderate inflammation, infiltrating mononuclear cells, lymphocytes, and plasmocytes**Score=3:** high level of inflammation, transmural mononuclear cells, infiltrating lymphocytes and plasmocytes**B**

WT Colon

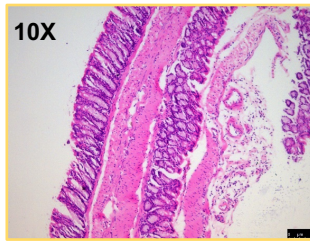CD19<sup>-/-</sup> Colon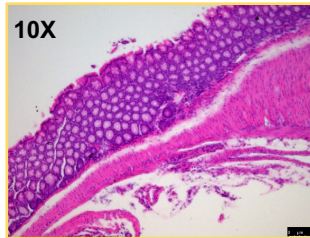**C**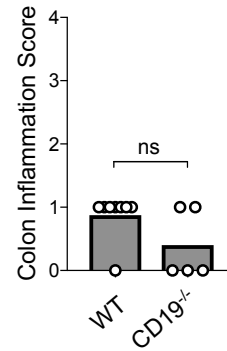

**Supplementary Figure S5. Steady-state colonic inflammation is similar between WT and CD19<sup>-/-</sup> mice.** (A) Scoring rubric followed by blinded pathologist to assess the degree of colonic inflammation. (B) Representative H&E stained longitudinal sections of colons from WT and CD19<sup>-/-</sup> mice. (C) Colonic inflammation scores of WT and CD19<sup>-/-</sup> mice during steady-state conditions. Students t-test; ns=non-significant.

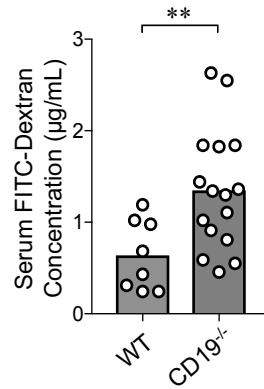

**Supplementary Figure S6. Comparison of gut permeability between WT and CD19<sup>-/-</sup> mice under steady-state conditions.** Fasted (8 hours) WT and CD19<sup>-/-</sup> mice were orally gavaged with 60mg/100g of FITC-dextran. Animals were euthanized, blood was drawn, and serum concentrations of FITC-dextran were measured on a fluorescent plate reader 4 hours later. Student's t-test; \*\*= $p < 0.01$ .

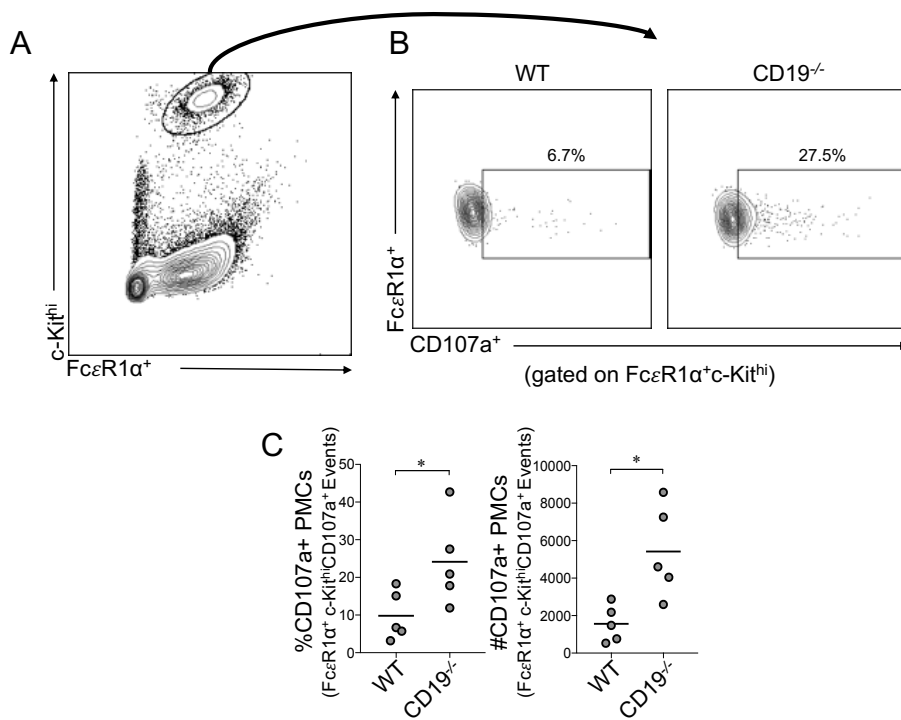

**Supplementary Figure S7. Activated mast cells are enriched in the peritoneal cavity of CD19<sup>-/-</sup> mice.** Peritoneal lavage fluid was collected from WT and CD19<sup>-/-</sup> mice and the abundance of mast cells (FcεR1α<sup>+</sup>c-Kit<sup>hi</sup>) were enumerated via flow cytometry. **(A)** Representative flow cytometry plot of gating strategy to identify mast cells in peritoneal fluid. **(B)** Representative flow cytometry plot to identify activated (CD107a<sup>+</sup>) mast cells. **(C)** The relative and absolute abundance of mast cells in peritoneal fluids are shown. **(D)** The relative and absolute abundance of activated peritoneal mast cells are shown. Students t-test; \*=p<0.05, \*\*=p<0.01.
