# Supplementary material for: Gut Antibody Deficiency in a Mouse Model of CVID Results in Spontaneous Development of a Gluten-Sensitive Enteropathy
Source: Front Immunol. 2019 Oct 23;10:2484. doi: 10.3389/fimmu.2019.02484 (PMC6820504; doi:10.3389/fimmu.2019.02484)
Supplement: Supplementary Table 3 — DE Ileal OTUs. [file Table_3.xlsx]

## Sheet: Ileal Community DSFDR
otuID	taxonomy	Reject	Statistic	raw pvalue
7b28c20e72c6c95b3e604f0849245770	k__Bacteria; p__Verrucomicrobia; c__Verrucomicrobiae; o__Verrucomicrobiales; f__Verrucomicrobiaceae; g__Akkermansia; s__muciniphila	TRUE	7.57576	0.003996
daae43be6cf06991f62a085ba8bff3b6	k__Bacteria; p__Bacteroidetes; c__Bacteroidia; o__Bacteroidales; f__S24-7; g__; s__	TRUE	-8.18182	0.002997
2eb2fe0471e37d54b5e1c47660220ad6	k__Bacteria; p__Bacteroidetes; c__Bacteroidia; o__Bacteroidales; f__S24-7; g__; s__	TRUE	-8.78788	0.000999001
7421a0056850e30172e2c541c9215c11	k__Bacteria; p__Proteobacteria; c__Betaproteobacteria; o__Burkholderiales; f__Alcaligenaceae; g__Sutterella; s__	TRUE	10	0.000999001
08a568a23077f42668f7b4b5e0ce437e	k__Bacteria; p__Bacteroidetes; c__Bacteroidia; o__Bacteroidales; f__S24-7; g__; s__	TRUE	7.87879	0.003996
11bd305099dce16ecd99f2cb50aa2e40	k__Bacteria; p__Bacteroidetes; c__Bacteroidia; o__Bacteroidales; f__S24-7; g__; s__	TRUE	-7.17172	0.00599401
01b2feeacd8a67179dab156bd6c90798	k__Bacteria; p__Bacteroidetes; c__Bacteroidia; o__Bacteroidales; f__S24-7; g__; s__	TRUE	6.36364	0.00599401
1f3fd62411d77829787c03e7d1e3dabf	k__Bacteria; p__Bacteroidetes; c__Bacteroidia; o__Bacteroidales; f__S24-7; g__; s__	TRUE	10	0.000999001
721bbde09abf2f51fc7d8caeab5b22f1	k__Bacteria; p__Firmicutes; c__Clostridia; o__Clostridiales; f__Clostridiaceae	TRUE	6.76768	0.00699301
bc9e113079c7849f78dc82597208e15e	k__Bacteria; p__Bacteroidetes; c__Bacteroidia; o__Bacteroidales; f__S24-7; g__; s__	TRUE	8.18182	0.000999001
39f1b510d3d0f5a6d28609e5a26641a9	k__Bacteria; p__Bacteroidetes; c__Bacteroidia; o__Bacteroidales; f__S24-7; g__; s__	TRUE	6.36364	0.00699301
69a11f927915e2a3ba1f7b9c84486527	k__Bacteria; p__Proteobacteria; c__Betaproteobacteria; o__Burkholderiales; f__Alcaligenaceae; g__Sutterella; s__	TRUE	-10	0.000999001
9cf3ece63fb5e5d8a14a81d6ec6f2b7b	k__Bacteria; p__Firmicutes; c__Clostridia; o__Clostridiales; f__Clostridiaceae; g__Candidatus Arthromitus; s__	TRUE	9.09091	0.000999001
9742d3ac5a2fddb31dea2f57b6f5a70e	k__Bacteria; p__Bacteroidetes; c__Bacteroidia; o__Bacteroidales; f__S24-7; g__; s__	TRUE	-5.55556	0.00999001
