# Supplementary material for: Gut Antibody Deficiency in a Mouse Model of CVID Results in Spontaneous Development of a Gluten-Sensitive Enteropathy
Source: PubMed Central journal article supplement (PMC6820504; doi:10.3389/fimmu.2019.02484), 2019-10-23
Supplement: Table_1.pdf [file Table_1.pdf]

**Supplementary Table 1. List of flow cytometry antibodies used in this study**

| <b>Antibody</b>                      | <b>Fluor</b> | <b>Clone</b> | <b>Vendor</b>    | <b>Catalog #</b> | <b>Concentration</b> |
|--------------------------------------|--------------|--------------|------------------|------------------|----------------------|
| Anti-mouse CD4                       | FITC         | GK1.5        | Biolegend        | 100406           | 0.5mg/ml             |
| Anti-mouse CD19                      | PercP.Cy5.5  | 1D3/CD19     | Biolegend        | 152405           | 0.2mg/ml             |
| Anti-mouse B220                      | PercP.Cy5.5  | RA3-6B2      | Biolegend        | 103235           | 0.2mg/ml             |
| Anti-mouse GL7                       | FITC         | GL7          | Biolegend        | 144612           | 0.5mg/ml             |
| Anti-mouse FAS                       | PE           | SA367H8      | Biolegend        | 152607           | 0.2mg/ml             |
| Anti-mouse CD43                      | APC          | S11          | Biolegend        | 143207<br>143208 | 0.2mg/ml             |
| Anti-mouse CD5                       | PE           | 53-7.3       | Biolegend        | 100607           | 0.2mg/ml             |
| Anti-mouse CD138                     | APC          | 281-2        | Biolegend        | 142505           | 0.2mg/ml             |
| Anti-mouse CD3 $\epsilon$            | APC.Cy7      | 145-2C11     | Biolegend        | 100330           | 0.2mg/ml             |
| Anti-mouse PD-1                      | PE.Cy7       | 29F.1A12     | Biolegend        | 135215           | 0.2mg/ml             |
| Anti-mouse CXCR5                     | PE           | L138D7       | Biolegend        | 145503           | 0.2mg/ml             |
| Anti-mouse IgA                       | PE           | 11-44-2      | Southern Biotech | 1165-09L         | 0.1mg/ml             |
| Anti-mouse CD8a                      | PE           | 53-6.7       | Biolegend        | 100708           | 0.2mg/ml             |
| Anti-mouse cKit                      | APC          | 2B8          | Biolegend        | 105811           | 0.2mg/ml             |
| Anti-mouse CD107a                    | PE           | 1D4B         | Biolegend        | 121611           | 0.2mg/ml             |
| Anti-mouse CD45                      | PE.Cy7       | 30-F11       | Biolegend        | 103113           | 0.2mg/ml             |
| Anti-mouse Fc $\epsilon$ R1 $\alpha$ | FITC         | MAR-1        | Biolegend        | 134305           | 0.5mg/ml             |
